# Supplementary material
Source: Springer Nature journal article supplement (https://www.springermedizin.de/resource/supplementary/12974_2013_928_MOESM3_ESM.pdf/9600518)

A. *OPRK1*

$P < 0.005$

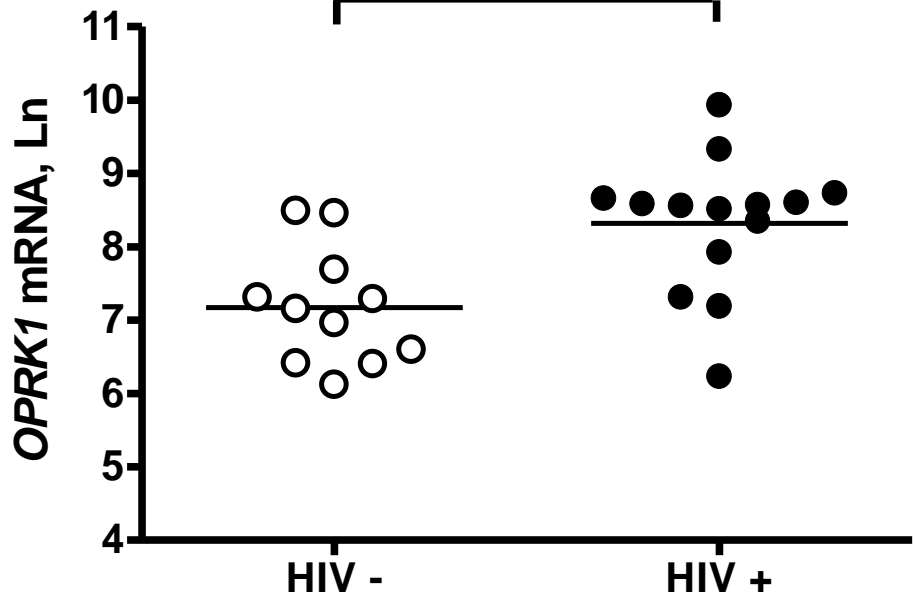

B. *PDYN*

$P < 0.005$

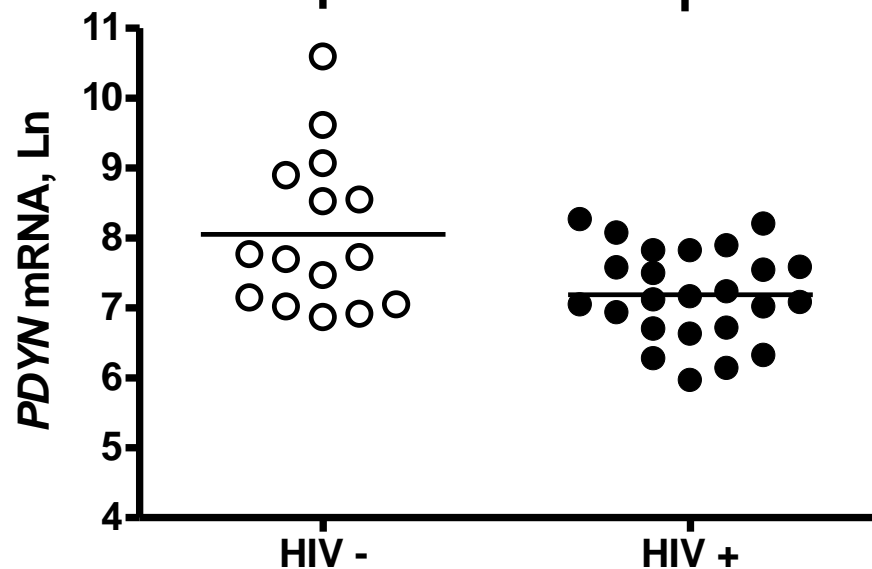

Supplement: MOESM3 [file 9600518]
